# Supplementary material for: A surface-display biohybrid approach to light-driven hydrogen production in air
Source: PubMed Central journal article supplement — Sci Adv. 2018 Feb 21;4(2):eaap9253. doi: 10.1126/sciadv.aap9253 (PMC5821488; doi:10.1126/sciadv.aap9253), 2018-02-21
Supplement: aap9253_SM.pdf [file aap9253_SM.pdf]

## Supplementary Materials for

### **A surface-display biohybrid approach to light-driven hydrogen production in air**

Wei Wei, Peiqing Sun, Zhen Li, Kuisong Song, Wenyin Su, Bao Wang, Yangzhong Liu, Jing Zhao

Published 21 February 2018, *Sci. Adv.* **4**, eaap9253 (2018)

DOI: 10.1126/sciadv.aap9253

#### **This PDF file includes:**

- fig. S1. The amount of biosynthesized CdS nanoparticles on the engineered *E. coli* cell surface was measured by ICP-MS.
- fig. S2. Characterization of biologically precipitated CdS nanoparticles on the outer membranes of *E. coli* cells.
- fig. S3. Photon transfer by in situ biosynthesized CdS nanoparticles.
- fig. S4. Quantitative comparison of the photoelectrical capacity of an in situ biosynthesized CdS nanoparticle.
- fig. S5. Image of encapsulated hybrid aggregates.

## Supplementary Results

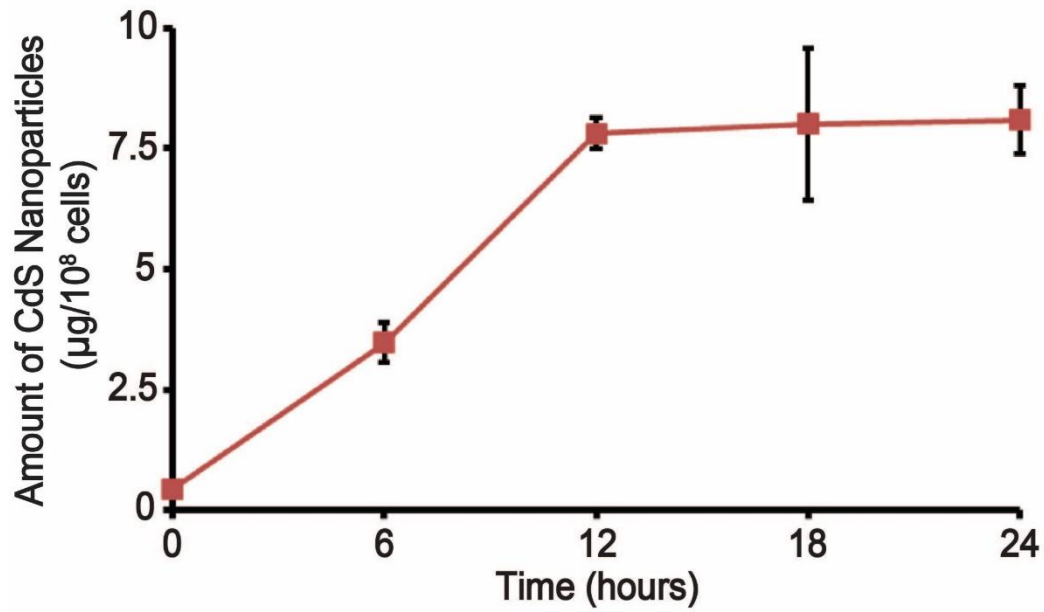

**fig. S1.** The amount of biosynthesized CdS nanoparticles on the engineered *E. coli* cell surface was measured by ICP-MS. The mean values of three independently performed experiments were performed. Error bars correspond to the standard deviations.

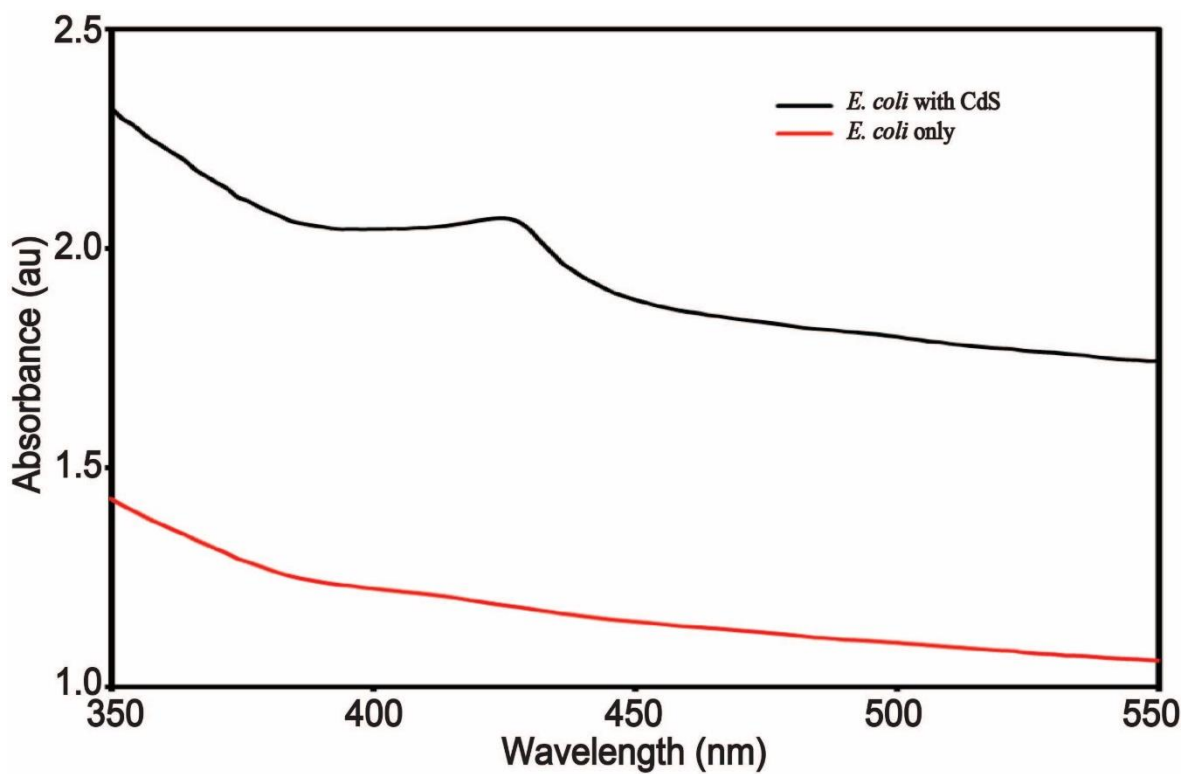

**fig. S2. Characterization of biologically precipitated CdS nanoparticles on the outer membranes of *E. coli* cells.** The UV-Vis Spectrum of *E. coli*/CdS hybrids in solution demonstrating a band gap at 424 nm.

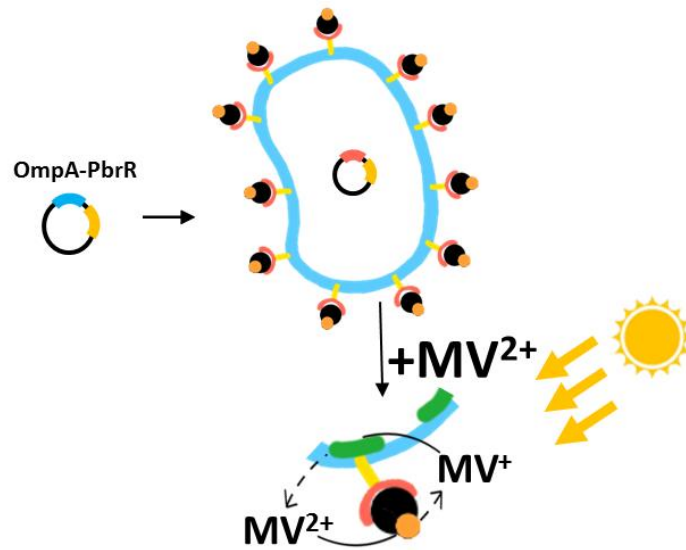

**fig. S3. Photon transfer by in situ biosynthesized CdS nanoparticles.** Details showing in situ CdS nanoparticles' adsorbing the photon from light and producing electrons to  $MV^{2+}$ . The sun indicates the source of photon and light power.

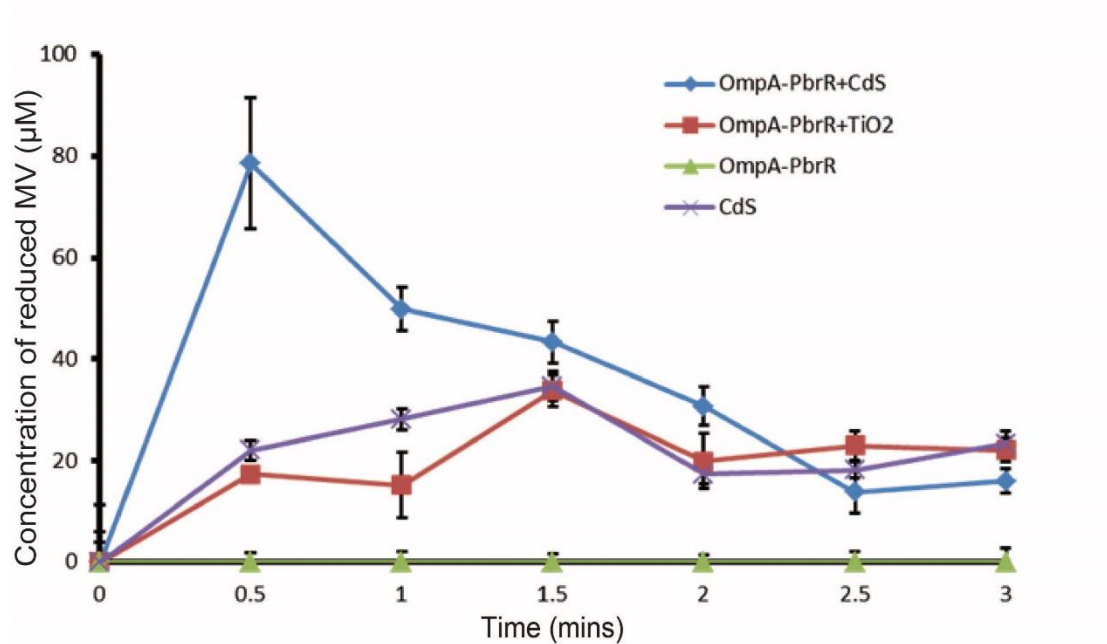

fig. S4. Quantitative comparison of the photoelectrical capacity of an in situ biosynthesized CdS nanoparticle.

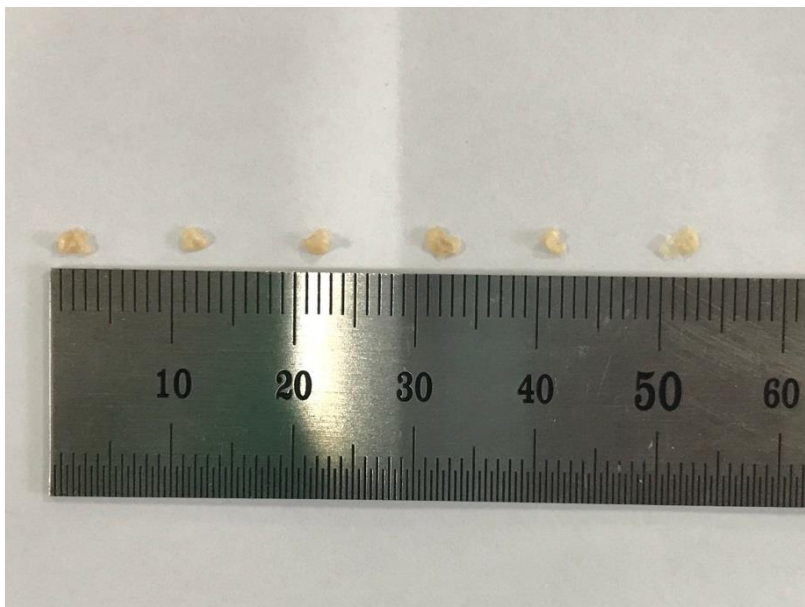

**fig. S5. Image of encapsulated hybrid aggregates.**
